# Supplementary material for: Quantified Morphology of the Cervical and Subdiaphragmatic Vagus Nerves of Human, Pig, and Rat
Source: PubMed Central journal article supplement (PMC7672126; doi:10.3389/fnins.2020.601479), 2020-11-04
Supplement: Data_Sheet_1.pdf [file Data_Sheet_1.pdf]

# Quantified Morphology of the Cervical and Subdiaphragmatic Vagus Nerves of Human, Pig, and Rat

## Supplemental Materials

**Nicole A. Pelot<sup>1\*</sup>, Gabriel B. Goldhagen<sup>1</sup>, Jake E. Cariello<sup>1</sup>, Eric D. Musselman<sup>1</sup>, Kara A. Clissold<sup>2</sup>, J. Ashley Ezzell<sup>2</sup>, Warren M. Grill<sup>1,3,4,5\*</sup>**

<sup>1</sup>Duke University, Department of Biomedical Engineering, Durham, NC, USA

<sup>2</sup>University of North Carolina, Histology Research Core, Chapel Hill, NC, USA

<sup>3</sup>Duke University, Department of Electrical and Computer Engineering, Durham, NC, USA

<sup>4</sup>Duke University, Department of Neurobiology, Durham, NC, USA

<sup>5</sup>Duke University, Department of Neurosurgery, Durham, NC, USA

**\* Correspondence:**

Nicole A. Pelot

[nikki.pelot@duke.edu](mailto:nikki.pelot@duke.edu)

Warren M. Grill

[warren.grill@duke.edu](mailto:warren.grill@duke.edu)

doi: 10.3389/fnins.2020.601479

## 1 Supplement 1

### 1.1 Subject Metadata

**Table 1.** Metadata for human cadaveric subjects. “Analyzed morphology” indicates whether the vagus nerve morphology of at least one sample from that cadaver was quantified. Ages above 89 years old were recorded as “90+” because specifying the specific numbers constitutes protected health information.

| Analyzed morphology | Subject ID | Age (years) | Sex    | Body mass (lb) | Height (inches) | Days from death to embalming | Cause of death                                  | Other diseases                                                                                                   | Race      |
|---------------------|------------|-------------|--------|----------------|-----------------|------------------------------|-------------------------------------------------|------------------------------------------------------------------------------------------------------------------|-----------|
| --                  | C42        | 61          | Male   | 140            | 69              | 3 to 4                       | Sever emphysema                                 | --                                                                                                               | Unknown   |
| --                  | C43        | 76          | Male   | 192            | 68              | 3 to 4                       | Bladder cancer                                  | --                                                                                                               | Unknown   |
| --                  | C44        | 59          | Female | 87             | 62              | 3 to 4                       | Lung cancer                                     | --                                                                                                               | Unknown   |
| --                  | C45        | 89          | Male   | 127            | 69              | 3 to 4                       | Parkinson's disease                             | --                                                                                                               | Unknown   |
| Y                   | C46        | 90+         | Female | 130            | 67              | 3 to 4                       | CHF                                             | --                                                                                                               | Unknown   |
| Y                   | C47        | 78          | Female | 130            | 63              | 3 to 4                       | CHF                                             | Hyperlipidemia                                                                                                   | Unknown   |
| --                  | C48        | 90          | Male   | 179            | 68              | 3 to 4                       | Prostate cancer                                 | Hypertension, Diabetes                                                                                           | Unknown   |
| --                  | C49        | 89          | Female | 100            | 59              | 3 to 4                       | Malnutrition                                    | --                                                                                                               | Unknown   |
| Y                   | C50        | 67          | Male   | 175            | 67              | 3 to 4                       | Respiratory failure                             | --                                                                                                               | Unknown   |
| --                  | C51        | 73          | Female | 149            | 67              | 2                            | Complications of wrist fracture and Alzheimer's | --                                                                                                               | Unknown   |
| Y                   | C53        | 84          | Male   | 160            | 67              | 1                            | Squamous cell carcinoma of skin                 | Malignant neoplasma of left & right lung, laryngeal cancer, hypertension                                         | Unknown   |
| Y                   | C54        | 90+         | Male   | 130            | 70              | 3                            | Metastatic prostate cancer                      | History of CVA, stage 3 kidney disease                                                                           | Unknown   |
| Y                   | C55        | 90+         | Male   | 134            | 73              | 2                            | Idiopathic pulmonary fibrosis                   | Pulmonary arthrosis, osteoporosis, RA, b/l hernia, HX spinal compression FX, dyspepsia                           | Caucasian |
| Y                   | C56        | 59          | Female | 123            | 66              | 4                            | Respiratory failure                             | Non-small cell lung cancer, chronic obstruction pulmonary                                                        | Caucasian |
| Y                   | C57        | 90+         | Male   | 192            | 72              | 2                            | Coronary artery disease                         | Hypertension, chronic respiratory failure, systolic dysfunction, pleural effusion                                | Caucasian |
| Y                   | C58        | 86          | Female | 148            |                 | 4                            | Hypertensive heart disease with heart failure   | Heart issues, hyperlipidemia, essential (primary) hypertension, chronic atrial fibrillation, hematoma in stomach | Unknown   |
| --                  | C59        | 81          | Female | 104            | 61              | 2                            | Vascular dementia                               | Cardiovascular disease, hyper tension, stroke, chronic kidney disease                                            | Unknown   |
| Y                   | C60        | 90+         | Female | 90             | 64              | 1                            | Urinary tract infection                         | --                                                                                                               | Unknown   |
| --                  | C61        | 88          | Female | 152            | 65              | 2                            | Liver cancer                                    | Colon cancer, asthma, had pacemaker                                                                              | Unknown   |
| --                  | C62        | 79          | Male   | 127            | 66              | 0                            | Esophageal cancer                               | Severe scoliosis, bowel obstruction, had spinal stimulator                                                       | Unknown   |
| Y                   | C63        | 85          | Female | 145            | 65              | 1 to 4                       | Myocardial infarction                           | --                                                                                                               | Caucasian |
| Y                   | C64        | 56          | Male   | 150            | 70              | 1 to 4                       | Cardiac arrest                                  | Spinal fusion                                                                                                    | Caucasian |

|    |     |     |        |     |    |        |                           |                                                                                  |           |
|----|-----|-----|--------|-----|----|--------|---------------------------|----------------------------------------------------------------------------------|-----------|
| Y  | C65 | 54  | Female | 122 | 59 | 1 to 4 | Kidney cancer             | --                                                                               | Caucasian |
| -- | C66 | 75  | Male   | 112 | 67 | 1 to 4 | COPD                      | --                                                                               | Caucasian |
| -- | C67 | 90+ | Female | 114 | 62 | 1 to 4 | Congestive heart failure  | Alzheimer's                                                                      | Unknown   |
| -- | C68 | 89  | Male   | 150 | 65 | 1 to 4 | Anoxic brain injury       | Firm white gall bladder (no bile); descending aorta blockage, leadless pacemaker | Caucasian |
| Y  | C69 | 87  | Male   | 130 | 70 | 1 to 4 | Pleural effusion          | --                                                                               | Caucasian |
| Y  | C70 | 84  | Male   | 149 | 70 | 1 to 4 | Lung cancer               | Macular degeneration                                                             | Unknown   |
| -- | C71 | 90+ | Female | 126 | 63 | 1 to 4 | Dementia                  | --                                                                               | Caucasian |
| -- | C72 | 79  | Female | 165 | 64 | 1 to 4 | Interstitial lung disease | Recent stroke, dementia                                                          | Caucasian |

**Table 2.** Metadata for pigs. “Analyzed morphology” indicates whether the complete vagus nerve morphology of at least one sample from that pig was quantified. “Analyzed perineurium” indicates whether the perineurium thickness of at least one sample from that pig was quantified using anti-fibronectin immunofluorescence.

| Analyzed morphology | Analyzed perineurium | Subject ID | Age (weeks) | Sex    | Body mass (kg) | Days from sample collection to embedding in paraffin | Use/treatment prior to post-mortem dissection                                                                                                                                                                                                                                             |
|---------------------|----------------------|------------|-------------|--------|----------------|------------------------------------------------------|-------------------------------------------------------------------------------------------------------------------------------------------------------------------------------------------------------------------------------------------------------------------------------------------|
| Y                   | --                   | P4         | 13          | Female | 34.3           | 7                                                    | Laparotomy training                                                                                                                                                                                                                                                                       |
| Y                   | --                   | P5         | 13          | Female | 32.8           | 7                                                    | Laparotomy training                                                                                                                                                                                                                                                                       |
| Y                   | --                   | P6         | 13          | Female | 28.2           | 7                                                    | Laparotomy training                                                                                                                                                                                                                                                                       |
| --                  | --                   | P7         | 13          | Female | 29.6           | 7                                                    | Laparotomy training                                                                                                                                                                                                                                                                       |
| Y                   | --                   | P8         | 13          | Female | 28.7           | 7                                                    | Laparotomy training                                                                                                                                                                                                                                                                       |
| Y                   | Y                    | P9         | 15          | Female | 45             | 5                                                    | Laparotomy training                                                                                                                                                                                                                                                                       |
| Y                   | --                   | P10        | 15          | Female | 45             | 5                                                    | Laparotomy training                                                                                                                                                                                                                                                                       |
| Y                   | Y                    | P11        | 10.5        | Male   | 24.4           | 5                                                    | Heparinized & perfused with saline (6L) + heparin (10000 units per 10 mL / 1L saline)                                                                                                                                                                                                     |
| Y                   | Y                    | P12        | 10.5        | Male   | 23.4           | 5                                                    | 4 days with paclitaxel (chemo drug); 0.5 mL/kg each day (clinical dosage); Heparinized & perfused with saline (5L) + heparin (10000 units per 10 mL / 1L saline)                                                                                                                          |
| Y                   | Y                    | P13        | 10.5        | Male   | 23.8           | 5                                                    | 4 days with paclitaxel (chemo drug); 0.5 mL/kg each day (clinical dosage) + stem cell treatment in intrathecal space (500000 bone marrow strombal cells in 5 mL of saline) 1 day before euthanasia; Heparinized & perfused with saline (5L) + heparin (10000 units per 10 mL / 1L saline) |
| Y                   | Y                    | P14        | 14          | Female | 38.5           | 5                                                    | Laparotomy training                                                                                                                                                                                                                                                                       |
| Y                   | Y                    | P15        | 14          | Female | 39.5           | 5                                                    | Laparotomy training                                                                                                                                                                                                                                                                       |

**Table 3.** Metadata for rats. “Analyzed morphology” indicates whether the vagus nerve morphology of at least one sample from that rat was quantified. Note 1: Only date of arrival, not date of birth, was available. Given that a 250 g female rat was ordered, it was assumed to be 15 weeks old upon arrival based on the weight vs. age data from Charles River: <https://www.criver.com/products-services/find-model/sas-sprague-dawley-rat?region=3611>. Note 2: Only date of arrival, not date of birth, was available. Given that a 250 g male rat was ordered, it was assumed to be 8 weeks old upon arrival based on the weight vs. age data from Charles River: <https://www.criver.com/products-services/find-model/sas-sprague-dawley-rat?region=3611>.

| Analyzed morphology | Subject ID | Age (days) | Sex                        | Body mass (g) | Days from sample collection to embedding in paraffin |
|---------------------|------------|------------|----------------------------|---------------|------------------------------------------------------|
| Y                   | R16        | 94         | Male                       | 534           | 8                                                    |
| Y                   | R17        | 189        | Male                       | 422           | 8                                                    |
| Y                   | R18        | 268        | Female                     | 312           | 8                                                    |
| Y                   | R20        | 75         | Male                       | 431           | 6                                                    |
| Y                   | R21        | 115        | Female <sup>(Note 1)</sup> | 266           | 6                                                    |
| Y                   | R22        | 114        | Female <sup>(Note 1)</sup> | 260           | 7                                                    |
| Y                   | R23        | 88         | Male                       | 466           | 7                                                    |
| Y                   | R24        | 103        | Female                     | 292           | 8                                                    |
| Y                   | R25        | 141        | Male <sup>(Note 2)</sup>   | 570           | 6                                                    |
| Y                   | R26        | 89         | Female                     | 258           | 8                                                    |

## 1.2 Sample Metadata

**Table 4.** Metadata for human cadaveric vagus nerve samples, all of which have Masson’s trichrome-stained cross sections. “Analyzed morphology” indicates samples that underwent anti-claudin-1 immunohistochemistry for which the micrographs were then segmented and analyzed to quantify the morphology, as well as the cervical and subdiaphragmatic no primary controls (ctl). The “Distance from...” columns provide the distance from the center of the sample (from which we sectioned) to the indicated landmark. Note 1: This cervical vagus nerve had two trunks. Sample C55-3 was medial to sample C55-4. Note 2: We assumed that the embalming occurred 3 days after death. See Table 1 for range of delays between death and embalming. GE: gastroesophageal.

| Analyzed morphology | Subject ID | Sample ID | Level            | Laterality | Distance from carotid bifurcation (mm) | Distance from esophageal hiatus and from GE junction (mm) | Days from embalming to sample collection | Days from sample collection to embedding in paraffin |
|---------------------|------------|-----------|------------------|------------|----------------------------------------|-----------------------------------------------------------|------------------------------------------|------------------------------------------------------|
| --                  | C42        | 2         | Cervical         | Left       | 15                                     | --                                                        | 438 <sup>(Note 2)</sup>                  | 2                                                    |
| --                  | C42        | 1         | Cervical         | Right      | 20                                     | --                                                        | 438 <sup>(Note 2)</sup>                  | 2                                                    |
| --                  | C43        | 2         | Cervical         | Left       | 25                                     | --                                                        | 427 <sup>(Note 2)</sup>                  | 2                                                    |
| --                  | C43        | 1         | Cervical         | Right      | 25                                     | --                                                        | 427 <sup>(Note 2)</sup>                  | 2                                                    |
| --                  | C44        | 2         | Cervical         | Left       | 15                                     | --                                                        | 218 <sup>(Note 2)</sup>                  | 2                                                    |
| --                  | C44        | 1         | Cervical         | Right      | 15                                     | --                                                        | 218 <sup>(Note 2)</sup>                  | 2                                                    |
| --                  | C45        | 2         | Cervical         | Left       | 15                                     | --                                                        | 486 <sup>(Note 2)</sup>                  | 2                                                    |
| --                  | C45        | 1         | Cervical         | Right      | 25                                     | --                                                        | 486 <sup>(Note 2)</sup>                  | 2                                                    |
| Y                   | C46        | 2         | Cervical         | Left       | 30                                     | --                                                        | 365 <sup>(Note 2)</sup>                  | 2                                                    |
| --                  | C46        | 1         | Cervical         | Right      | 25                                     | --                                                        | 365 <sup>(Note 2)</sup>                  | 2                                                    |
| Y                   | C47        | 2         | Cervical         | Left       | 30                                     | --                                                        | 393 <sup>(Note 2)</sup>                  | 2                                                    |
| --                  | C47        | 1         | Cervical         | Right      | 35                                     | --                                                        | 393 <sup>(Note 2)</sup>                  | 2                                                    |
| --                  | C48        | 1         | Cervical         | Right      | 20                                     | --                                                        | 447 <sup>(Note 2)</sup>                  | 2                                                    |
| --                  | C49        | 1         | Cervical         | Right      | 30                                     | --                                                        | 389 <sup>(Note 2)</sup>                  | 2                                                    |
| Y                   | C50        | 2         | Cervical         | Left       | 30                                     | --                                                        | 445                                      | 2                                                    |
| --                  | C50        | 1         | Cervical         | Right      | 30                                     | --                                                        | 445                                      | 2                                                    |
| --                  | C51        | 1         | Subdiaphragmatic | Anterior   | --                                     | 7                                                         | 192                                      | 5                                                    |
| --                  | C51        | 3         | Subdiaphragmatic | Posterior  | --                                     | 10                                                        | 192                                      | 5                                                    |
| --                  | C53        | 3         | Subdiaphragmatic | Anterior   | --                                     | 10                                                        | 337                                      | 7                                                    |
| Y                   | C53        | 2         | Cervical         | Left       | 40                                     | --                                                        | 337                                      | 7                                                    |
| --                  | C53        | 4         | Subdiaphragmatic | Posterior  | --                                     | 10                                                        | 337                                      | 7                                                    |
| --                  | C53        | 1         | Cervical         | Right      | 30                                     | --                                                        | 337                                      | 7                                                    |
| Y                   | C54        | 2         | Subdiaphragmatic | Anterior   | --                                     | 12                                                        | 368                                      | 5                                                    |
| Y                   | C54        | 3         | Cervical         | Left       | 40                                     | --                                                        | 402                                      | 6                                                    |
| --                  | C54        | 1         | Subdiaphragmatic | Posterior  | --                                     | 12                                                        | 368                                      | 5                                                    |
| --                  | C54        | 4         | Cervical         | Right      | 45                                     | --                                                        | 402                                      | 6                                                    |
| ctl                 | C55        | 1         | Subdiaphragmatic | Anterior   | --                                     | 10                                                        | 294                                      | 5                                                    |

Pelot et al., 2020, *Frontiers in Neuroscience*, Supplements

|     |     |   |                  |                          |    |    |                         |   |
|-----|-----|---|------------------|--------------------------|----|----|-------------------------|---|
| --  | C55 | 4 | Cervical         | Left <sup>(Note 1)</sup> | 40 | -- | 328                     | 6 |
| Y   | C55 | 3 | Cervical         | Left <sup>(Note 1)</sup> | 40 | -- | 328                     | 6 |
| --  | C55 | 2 | Subdiaphragmatic | Posterior                | -- | 10 | 294                     | 5 |
| --  | C55 | 5 | Cervical         | Right                    | 35 | -- | 328                     | 6 |
| Y   | C56 | 1 | Subdiaphragmatic | Anterior                 | -- | 12 | 230                     | 5 |
| Y   | C56 | 3 | Cervical         | Left                     | 20 | -- | 264                     | 6 |
| --  | C56 | 2 | Subdiaphragmatic | Posterior                | -- | 10 | 230                     | 5 |
| --  | C56 | 4 | Cervical         | Right                    | 30 | -- | 264                     | 6 |
| Y   | C57 | 1 | Subdiaphragmatic | Anterior                 | -- | 12 | 290                     | 5 |
| Y   | C57 | 3 | Cervical         | Left                     | 40 | -- | 324                     | 6 |
| --  | C57 | 2 | Subdiaphragmatic | Posterior                | -- | 10 | 290                     | 5 |
| --  | C57 | 4 | Cervical         | Right                    | 30 | -- | 324                     | 6 |
| Y   | C58 | 1 | Subdiaphragmatic | Anterior                 | -- | 10 | 332                     | 5 |
| Y   | C58 | 3 | Cervical         | Left                     | 40 | -- | 366                     | 6 |
| --  | C58 | 2 | Subdiaphragmatic | Posterior                | -- | 12 | 332                     | 5 |
| --  | C58 | 4 | Cervical         | Right                    | 30 | -- | 366                     | 6 |
| --  | C59 | 3 | Cervical         | Left                     | 40 | -- | 387                     | 6 |
| --  | C59 | 4 | Cervical         | Right                    | 35 | -- | 387                     | 6 |
| ctl | C60 | 3 | Cervical         | Left                     | 35 | -- | 282                     | 6 |
| --  | C60 | 4 | Cervical         | Right                    | 30 | -- | 282                     | 6 |
| --  | C61 | 1 | Cervical         | Left                     | 40 | -- | 400                     | 6 |
| --  | C61 | 2 | Cervical         | Right                    | 30 | -- | 400                     | 6 |
| --  | C62 | 1 | Cervical         | Left                     | 30 | -- | 357                     | 6 |
| --  | C62 | 2 | Cervical         | Right                    | 35 | -- | 357                     | 6 |
| Y   | C63 | 1 | Subdiaphragmatic | Anterior                 | -- | 10 | 370 <sup>(Note 2)</sup> | 8 |
| Y   | C64 | 1 | Subdiaphragmatic | Anterior                 | -- | 10 | 368 <sup>(Note 2)</sup> | 8 |
| --  | C64 | 2 | Subdiaphragmatic | Posterior                | -- | 12 | 368 <sup>(Note 2)</sup> | 8 |
| Y   | C65 | 1 | Subdiaphragmatic | Anterior                 | -- | 10 | 402 <sup>(Note 2)</sup> | 8 |
| --  | C65 | 2 | Subdiaphragmatic | Posterior                | -- | 10 | 402 <sup>(Note 2)</sup> | 8 |
| --  | C66 | 2 | Subdiaphragmatic | Posterior                | -- | 12 | 162 <sup>(Note 2)</sup> | 8 |
| --  | C67 | 1 | Subdiaphragmatic | Anterior                 | -- | 10 | 297 <sup>(Note 2)</sup> | 8 |
| --  | C67 | 2 | Subdiaphragmatic | Posterior                | -- | 10 | 297 <sup>(Note 2)</sup> | 8 |
| --  | C68 | 1 | Subdiaphragmatic | Anterior                 | -- | 10 | 568 <sup>(Note 2)</sup> | 8 |
| --  | C68 | 2 | Subdiaphragmatic | Posterior                | -- | 10 | 568 <sup>(Note 2)</sup> | 8 |
| Y   | C69 | 1 | Subdiaphragmatic | Anterior                 | -- | 10 | 133 <sup>(Note 2)</sup> | 8 |
| --  | C69 | 2 | Subdiaphragmatic | Posterior                | -- | 10 | 133 <sup>(Note 2)</sup> | 8 |
| Y   | C70 | 1 | Subdiaphragmatic | Anterior                 | -- | 10 | 150 <sup>(Note 2)</sup> | 8 |
| --  | C70 | 2 | Subdiaphragmatic | Posterior                | -- | 10 | 150 <sup>(Note 2)</sup> | 8 |
| --  | C71 | 1 | Subdiaphragmatic | Anterior                 | -- | 10 | 330 <sup>(Note 2)</sup> | 8 |

|    |     |   |                  |           |    |    |                         |   |
|----|-----|---|------------------|-----------|----|----|-------------------------|---|
| -- | C71 | 2 | Subdiaphragmatic | Posterior | -- | 12 | 330 <sup>(Note 2)</sup> | 8 |
| -- | C72 | 1 | Subdiaphragmatic | Anterior  | -- | 10 | 403 <sup>(Note 2)</sup> | 8 |
| -- | C72 | 2 | Subdiaphragmatic | Posterior | -- | 10 | 403 <sup>(Note 2)</sup> | 8 |

**Table 5.** Metadata for pig vagus nerve samples, all of which have Masson’s trichrome-stained cross sections (except P7-7). (A) Samples for which the Masson’s trichrome cross section was segmented and analyzed to quantify the morphology. (B) Samples that underwent anti-fibronectin immunofluorescence, including the cervical and subdiaphragmatic controls (ctl; no primary and no primary/no secondary antibody controls for each control sample). (C) Samples for which the perineurium in the anti-fibronectin immunofluorescence cross section was segmented and analyzed to quantify perineurium thickness. The “Distance from carotid bifurcation” and “Distance from esophageal...” columns provide the distance from the center of the sample (from which we sectioned) to the indicated landmark. See Methods for the description of the “Distance from bottom of jaw to top of sternum”. GE: gastroesophageal.

| (A) | (B) | (C) | Subject ID | Sample ID | Level            | Laterality | Distance from carotid bifurcation (cm) | Distance from bottom of jaw to top of sternum (cm) | Distance from esophageal hiatus and from GE junction (mm) | Time from death to collection (hr) |
|-----|-----|-----|------------|-----------|------------------|------------|----------------------------------------|----------------------------------------------------|-----------------------------------------------------------|------------------------------------|
| --  | --  | --  | P4         | 2         | Cervical         | Right      | Not recorded                           | Not recorded                                       | --                                                        | 1.75                               |
| Y   | Y   | --  | P4         | 3         | Subdiaphragmatic | Anterior   | --                                     | --                                                 | 15                                                        | 2.5                                |
| --  | --  | --  | P4         | 4         | Subdiaphragmatic | Posterior  | --                                     | --                                                 | 20                                                        | 2.5                                |
| Y   | Y   | --  | P5         | 1         | Cervical         | Left       | Not recorded                           | Not recorded                                       | --                                                        | 2.25                               |
| --  | --  | --  | P5         | 2         | Cervical         | Right      | Not recorded                           | Not recorded                                       | --                                                        | 2.75                               |
| Y   | Y   | --  | P5         | 3         | Subdiaphragmatic | Anterior   | --                                     | --                                                 | 20                                                        | 3                                  |
| --  | --  | --  | P5         | 4         | Subdiaphragmatic | Posterior  | --                                     | --                                                 | 25                                                        | 3                                  |
| --  | ctl | --  | P6         | 1         | Subdiaphragmatic | Anterior   | --                                     | --                                                 | 20                                                        | 1                                  |
| --  | --  | --  | P6         | 3         | Subdiaphragmatic | Posterior  | --                                     | --                                                 | 22.5                                                      | 1                                  |
| --  | --  | --  | P6         | 5         | Cervical         | Right      | 5.25                                   | 13                                                 | --                                                        | 2                                  |
| Y   | Y   | --  | P6         | 7         | Cervical         | Left       | 5                                      | 13                                                 | --                                                        | 2.5                                |
| --  | --  | --  | P7         | 1         | Subdiaphragmatic | Anterior   | --                                     | --                                                 | 15                                                        | 2                                  |
| --  | --  | --  | P7         | 3         | Subdiaphragmatic | Posterior  | --                                     | --                                                 | 25                                                        | 2                                  |
| --  | --  | --  | P7         | 5         | Cervical         | Right      | 6.75                                   | 13                                                 | --                                                        | 3.5                                |
| --  | ctl | --  | P7         | 7         | Cervical         | Left       | 6.5                                    | 13                                                 | --                                                        | 3.5                                |
| Y   | Y   | --  | P8         | 1         | Subdiaphragmatic | Anterior   | --                                     | --                                                 | 25                                                        | 4                                  |
| --  | --  | --  | P8         | 3         | Subdiaphragmatic | Posterior  | --                                     | --                                                 | 35                                                        | 4                                  |
| --  | --  | --  | P8         | 5         | Cervical         | Right      | 5                                      | 13                                                 | --                                                        | 4                                  |
| Y   | Y   | --  | P8         | 7         | Cervical         | Left       | 4.25                                   | 13                                                 | --                                                        | 4                                  |
| --  | --  | --  | P9         | 1         | Subdiaphragmatic | Anterior   | --                                     | --                                                 | 22.5                                                      | 1                                  |

|    |    |    |     |   |                  |           |      |    |      |      |
|----|----|----|-----|---|------------------|-----------|------|----|------|------|
| -- | -- | -- | P9  | 2 | Subdiaphragmatic | Posterior | --   | -- | 35   | 1    |
| Y  | Y  | Y  | P9  | 3 | Cervical         | Left      | 6.25 | 14 | --   | 1.25 |
| -- | -- | -- | P9  | 4 | Cervical         | Right     | 7.25 | 14 | --   | 1.5  |
| Y  | Y  | -- | P10 | 1 | Subdiaphragmatic | Anterior  | --   | -- | 25   | 1    |
| -- | -- | -- | P10 | 2 | Subdiaphragmatic | Posterior | --   | -- | 30   | 1    |
| -- | -- | -- | P10 | 4 | Cervical         | Right     | 9    | 15 | --   | 1.25 |
| Y  | Y  | Y  | P11 | 1 | Cervical         | Left      | 6    | 15 | --   | 3    |
| -- | -- | -- | P11 | 2 | Cervical         | Right     | 6    | 15 | --   | 3    |
| Y  | Y  | -- | P11 | 3 | Subdiaphragmatic | Anterior  | --   | -- | 25   | 3    |
| -- | -- | -- | P11 | 4 | Subdiaphragmatic | Posterior | --   | -- | 25   | 3    |
| Y  | Y  | Y  | P12 | 1 | Cervical         | Left      | 4.75 | 13 | --   | 1.5  |
| -- | -- | -- | P12 | 2 | Cervical         | Right     | 5    | 13 | --   | 1.5  |
| Y  | Y  | Y  | P12 | 3 | Subdiaphragmatic | Anterior  | --   | -- | 27.5 | 1.5  |
| -- | -- | -- | P12 | 4 | Subdiaphragmatic | Posterior | --   | -- | 27.5 | 1.5  |
| Y  | Y  | -- | P13 | 1 | Cervical         | Left      | 6    | 13 | --   | 1.5  |
| -- | -- | -- | P13 | 2 | Cervical         | Right     | 6    | 13 | --   | 1.5  |
| Y  | Y  | Y  | P13 | 3 | Subdiaphragmatic | Anterior  | --   | -- | 25   | 1.5  |
| -- | -- | -- | P13 | 4 | Subdiaphragmatic | Posterior | --   | -- | 25   | 1.5  |
| -- | -- | -- | P14 | 1 | Cervical         | Right     | 7.9  | 15 | --   | 1    |
| Y  | Y  | Y  | P14 | 2 | Cervical         | Left      | 8    | 15 | --   | 1    |
| Y  | Y  | Y  | P14 | 3 | Subdiaphragmatic | Anterior  | --   | -- | 25   | 2.5  |
| -- | -- | -- | P14 | 4 | Subdiaphragmatic | Posterior | --   | -- | 25   | 2.5  |
| -- | -- | -- | P15 | 1 | Cervical         | Right     | 6    | 16 | --   | 1.5  |
| Y  | Y  | -- | P15 | 2 | Cervical         | Left      | 7.25 | 16 | --   | 1.5  |
| Y  | Y  | Y  | P15 | 3 | Subdiaphragmatic | Anterior  | --   | -- | 20   | 2    |
| -- | -- | -- | P15 | 4 | Subdiaphragmatic | Posterior | --   | -- | 20   | 2    |



**Table 6.** Metadata for rat vagus nerve samples, all of which have Masson’s trichrome-stained cross sections. “Analyzed morphology” indicates samples that underwent segmentation to quantify the morphology. “Laterality” is “Ant & post” (anterior and posterior) for the subdiaphragmatic samples because we dissected and sampled the whole esophagus with the vagus nerves attached. The “Distance from carotid bifurcation” and “Distance from esophageal hiatus and from GE junction” columns provide the distance from the center of the sample (from which we sectioned) to the indicated landmark. GE: gastroesophageal.

| Analyzed morphology | Subject ID | Sample ID | Level            | Laterality | Distance from carotid bifurcation (mm) | Distance from esophageal hiatus and from GE junction (mm) | Distance from esophageal hiatus to hepatic branch (mm) |
|---------------------|------------|-----------|------------------|------------|----------------------------------------|-----------------------------------------------------------|--------------------------------------------------------|
| Y                   | R16        | 1         | Subdiaphragmatic | Ant & post | --                                     | 6.5                                                       | 4                                                      |
| --                  | R16        | 2         | Cervical         | Right      | 12                                     | --                                                        | --                                                     |
| Y                   | R16        | 3         | Cervical         | Left       | 10.5                                   | --                                                        | --                                                     |
| Y                   | R17        | 1         | Subdiaphragmatic | Ant & post | --                                     | 9                                                         | 7                                                      |
| --                  | R17        | 2         | Cervical         | Right      | 11                                     | --                                                        | --                                                     |
| Y                   | R17        | 3         | Cervical         | Left       | 10.5                                   | --                                                        | --                                                     |
| Y                   | R18        | 1         | Cervical         | Left       | 13.5                                   | --                                                        | --                                                     |
| --                  | R18        | 2         | Cervical         | Right      | 11.5                                   | --                                                        | --                                                     |
| Y                   | R20        | 1         | Subdiaphragmatic | Ant & post | --                                     | 11.5                                                      | 11                                                     |
| --                  | R20        | 2         | Cervical         | Right      | 12                                     | --                                                        | --                                                     |
| Y                   | R20        | 3         | Cervical         | Left       | 10.5                                   | --                                                        | --                                                     |
| Y                   | R21        | 1         | Subdiaphragmatic | Ant & post | --                                     | 10                                                        | 10                                                     |
| --                  | R21        | 2         | Cervical         | Right      | 13                                     | --                                                        | --                                                     |
| Y                   | R21        | 3         | Cervical         | Left       | 12                                     | --                                                        | --                                                     |
| Y                   | R22        | 1         | Subdiaphragmatic | Ant & post | --                                     | 7.5                                                       | 6                                                      |
| --                  | R22        | 2         | Cervical         | Right      | 12                                     | --                                                        | --                                                     |
| Y                   | R22        | 3         | Cervical         | Left       | 12                                     | --                                                        | --                                                     |
| Y                   | R23        | 1         | Subdiaphragmatic | Ant & post | --                                     | 11                                                        | 12                                                     |
| --                  | R23        | 2         | Cervical         | Right      | 10.5                                   | --                                                        | --                                                     |
| Y                   | R23        | 3         | Cervical         | Left       | 11                                     | --                                                        | --                                                     |
| Y                   | R24        | 1         | Subdiaphragmatic | Ant & post | --                                     | 10                                                        | 10                                                     |
| --                  | R24        | 2         | Cervical         | Right      | 10                                     | --                                                        | --                                                     |
| Y                   | R24        | 3         | Cervical         | Left       | 9                                      | --                                                        | --                                                     |
| Y                   | R25        | 1         | Subdiaphragmatic | Ant & post | --                                     | 10                                                        | 11                                                     |
| --                  | R25        | 2         | Cervical         | Right      | 10.5                                   | --                                                        | --                                                     |
| Y                   | R25        | 3         | Cervical         | Left       | 14.5                                   | --                                                        | --                                                     |
| Y                   | R26        | 1         | Subdiaphragmatic | Ant & post | --                                     | 8.5                                                       | 10                                                     |

## 2 Supplement 2

Segmenting pig fascicles  
Endoneurium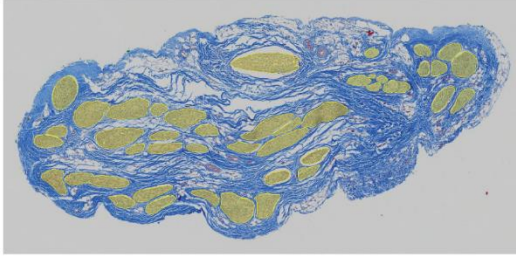

## Whitespace

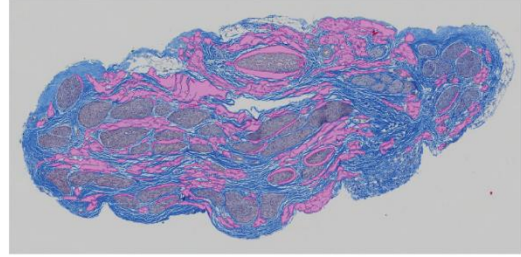

## Combined (final segmentation)

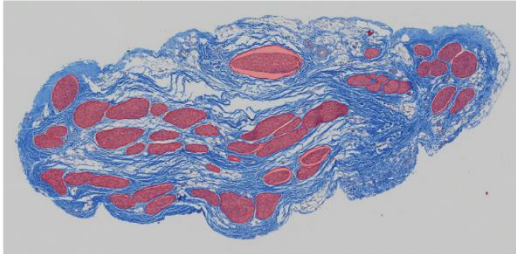

## Overlay of all layers

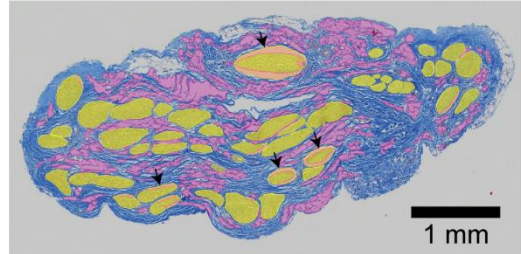

**Figure 11.** Example of pig fascicle segmentation. Top left: Endoneurium in yellow. Top right: Whitespace, meeting certain criteria (e.g., circularity), in pink. Bottom left: Final fascicle segmentation in red, where whitespace adjacent to endoneurium and endoneurium proper are merged. Bottom right: Overlay of all layers, where arrowheads provide examples of orange areas where the whitespace filled in the fascicular area to the inner edge of the perineurium.

## 3 Supplement 3

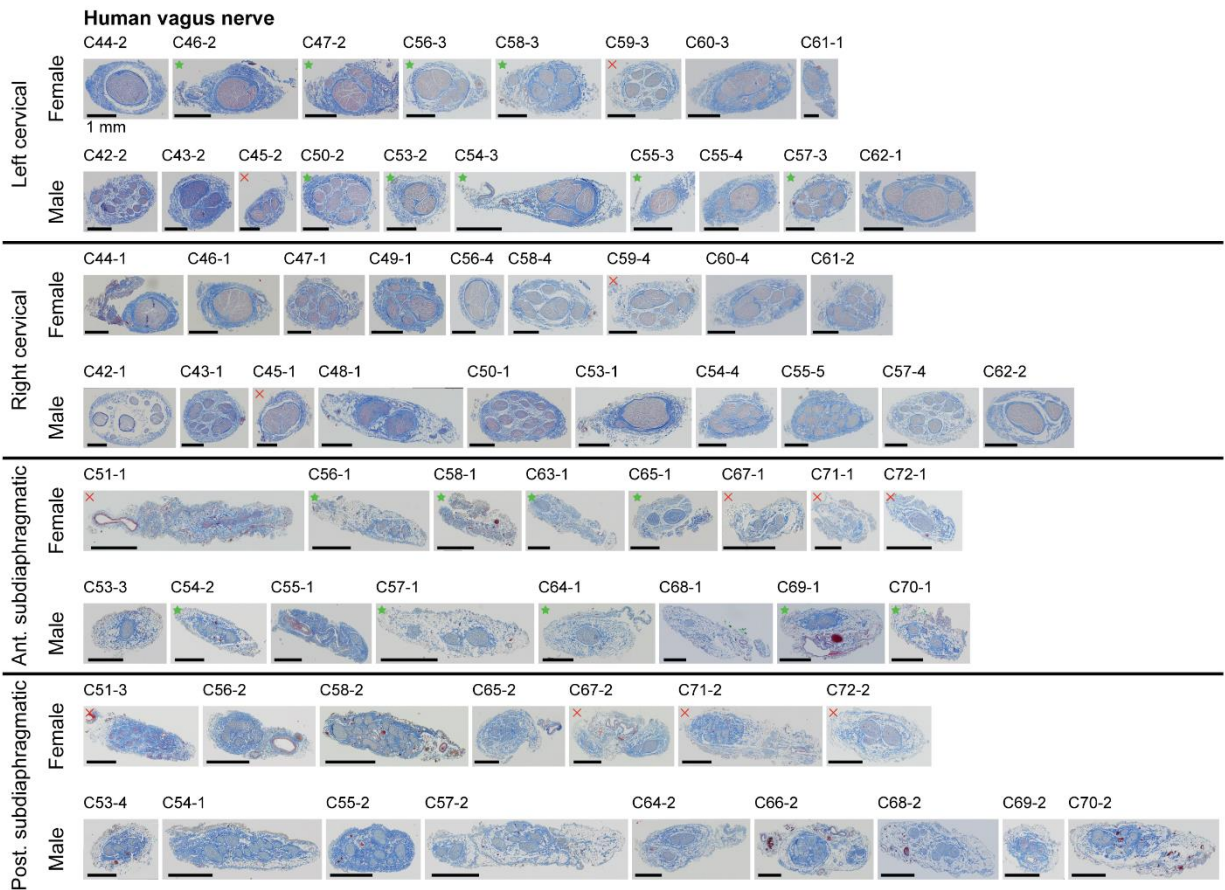

**Figure 12.** Human vagus nerve samples stained with Masson's trichrome. The green stars indicate the samples for which we quantified the morphology. The red X's indicate the samples from subjects with known neuropathies that were excluded when selecting samples for morphological analyses. Specifically, C45 had Parkinson's disease, C59 had vascular dementia, C51 and C67 had Alzheimer's, and C71 and C72 had dementia. All scale bars are 1 mm long. All original micrographs are available at (Pelot et al., 2020c).

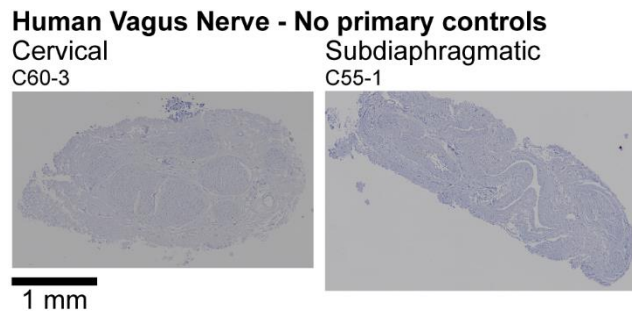

**Figure 13.** No primary controls for human vagus nerve samples that underwent claudin-1 immunohistochemistry. The original micrographs are available at (Pelot et al., 2020a).

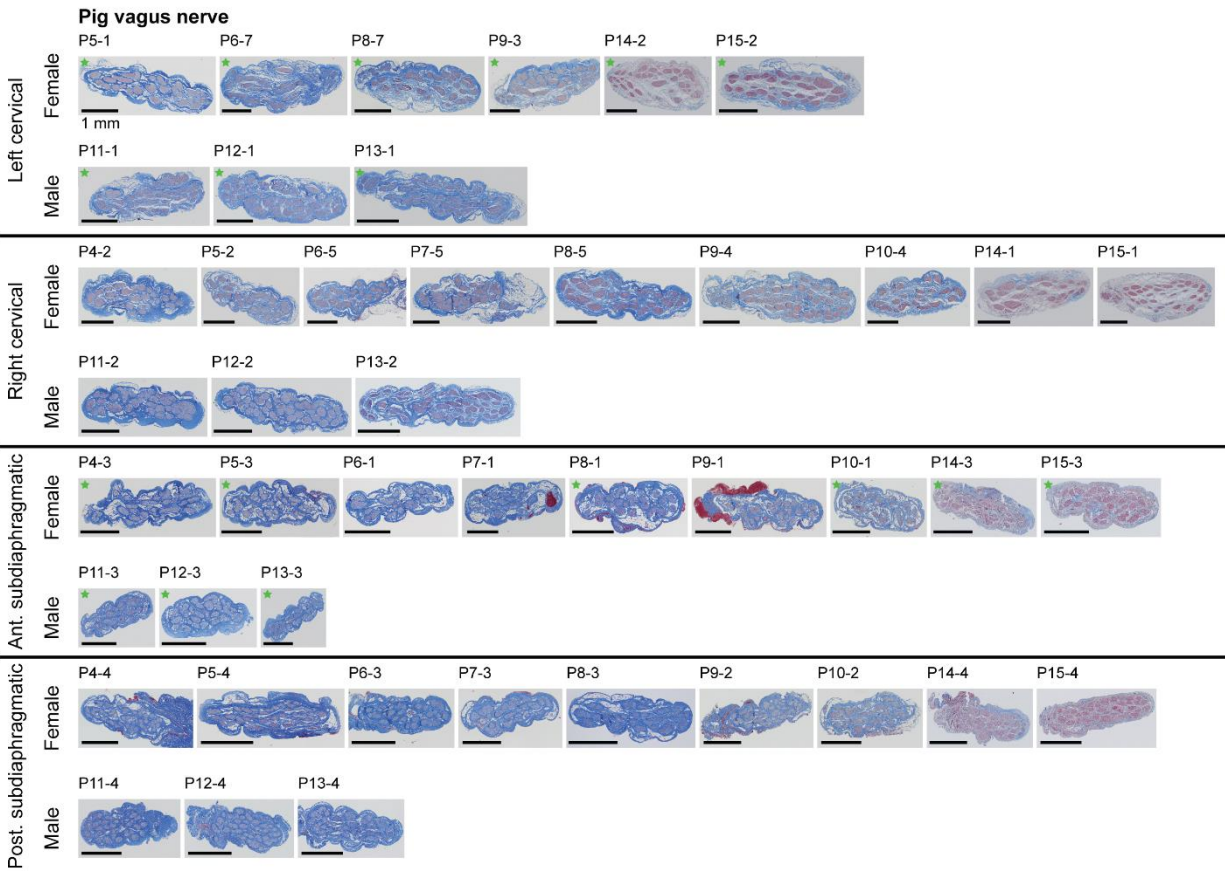

**Figure 14.** Pig vagus nerve samples stained with Masson’s trichrome. The green stars indicate the samples for which we quantified the morphology. All scale bars are 1 mm long. All original micrographs are available at (Pelot et al., 2020d).

Pig vagus nerve

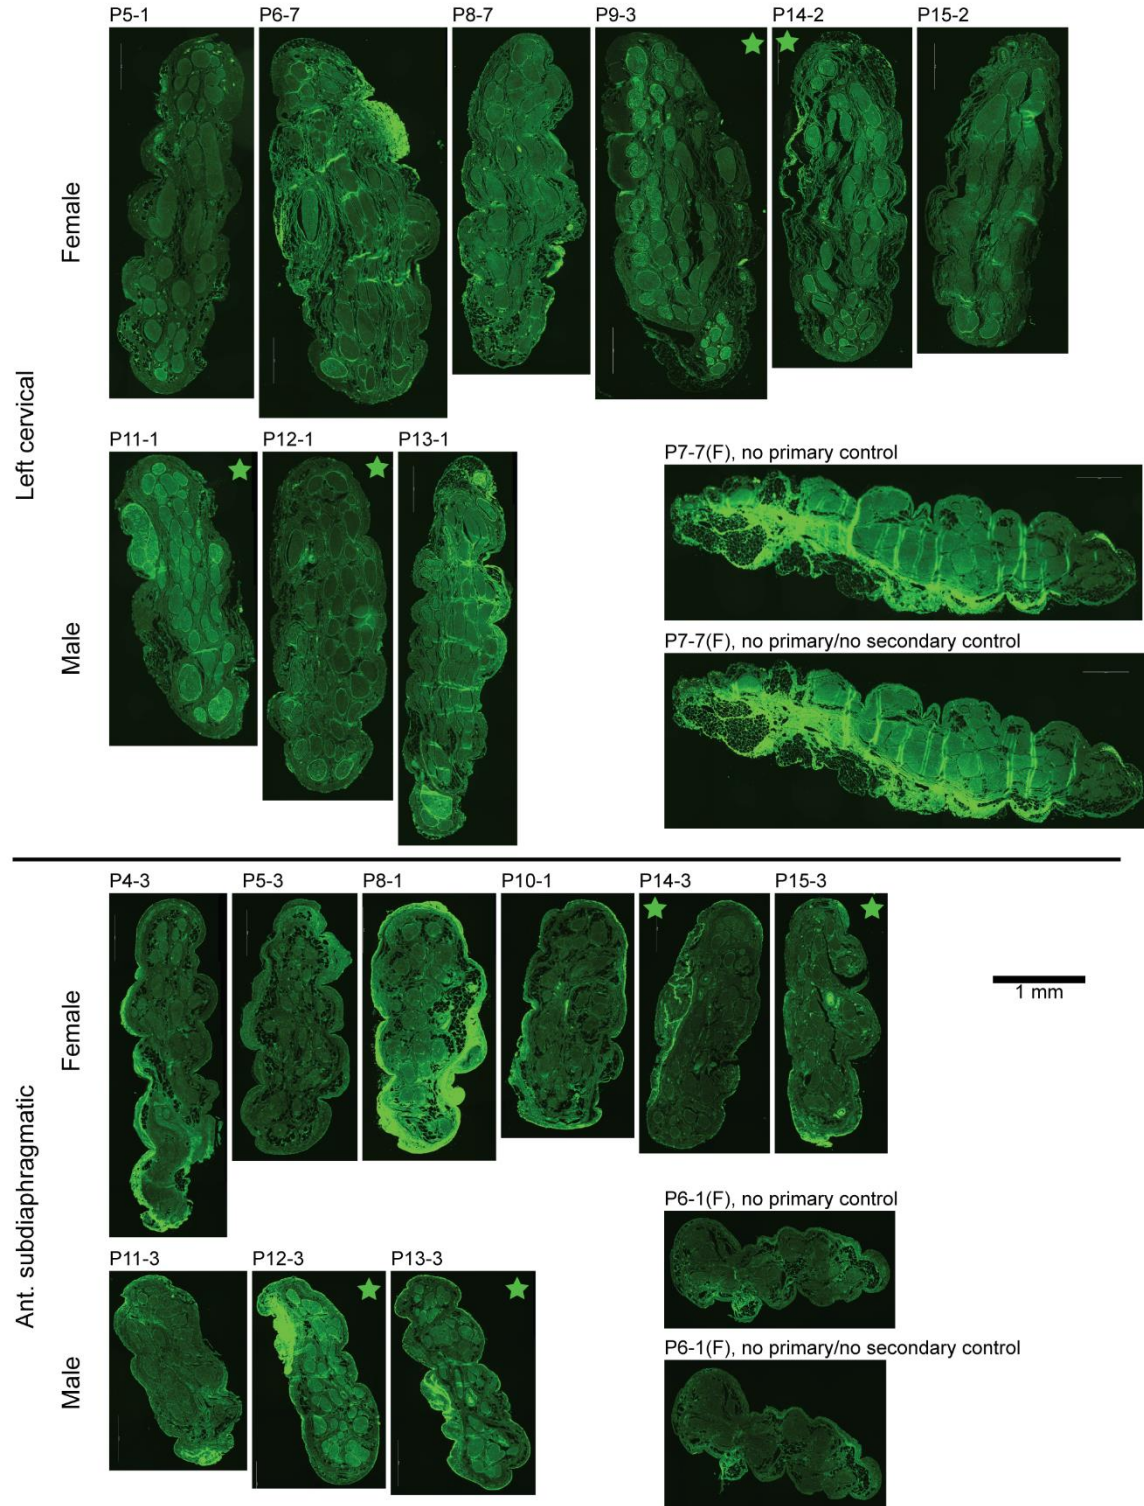

**Figure 15.** Pig vagus nerve samples that underwent anti-fibronectin immunofluorescence. The green stars indicate the samples for which we quantified the perineurium thickness. All images correspond to the same 1 mm scale bar. All original micrographs are available at (Pelot et al., 2020b).

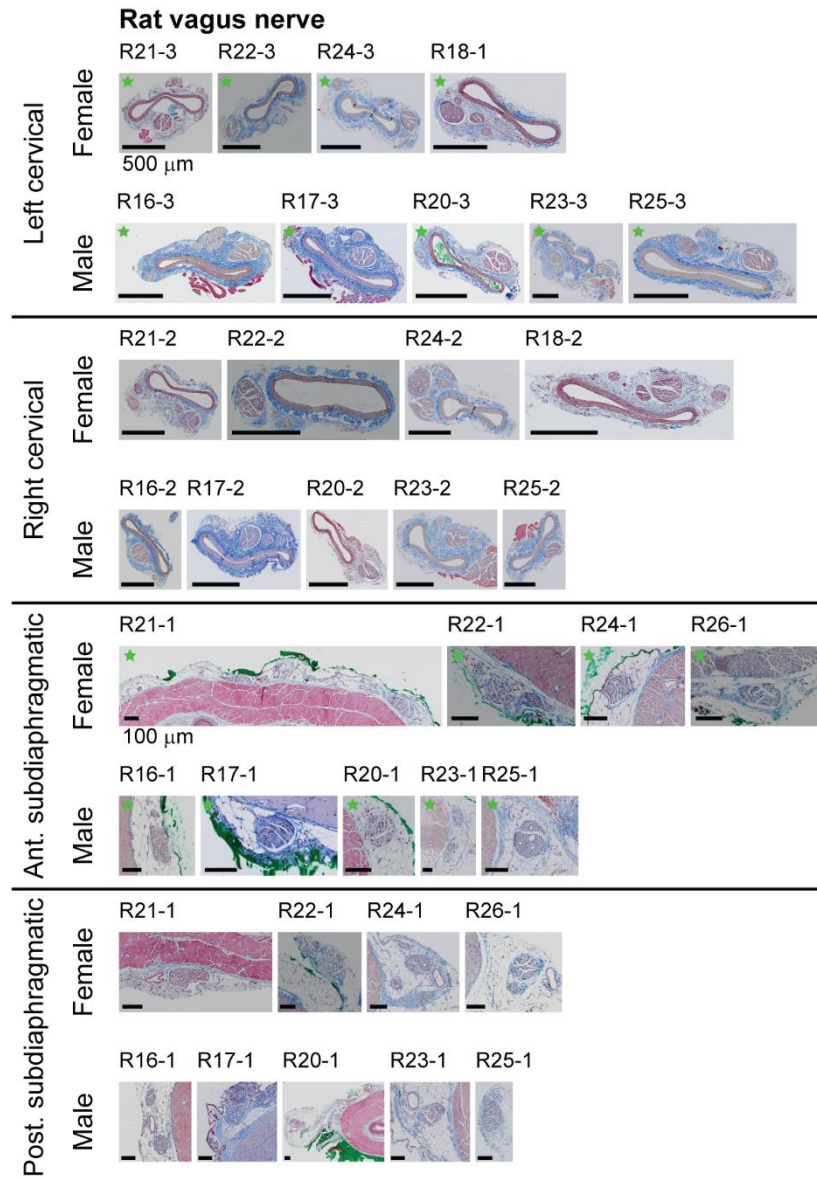

**Figure 16.** Rat vagus nerve samples stained with Masson’s trichrome. The green stars indicate the samples for which we quantified the morphology. In addition to the cross sections of the vagus nerve, the cervical micrographs also show the common carotid artery, as well as other nerves in the carotid sheath, while the subdiaphragmatic micrographs show the edge of the esophagus. All cervical scale bars are 0.5 mm long (top half) and all subdiaphragmatic scale bar are 0.1 mm long (bottom half). All original micrographs are available at (Pelot et al., 2020e).

#### 4 Supplement 4

Vagus Nerve Morphology: Summary Statistics and Literature Review

See Excel spreadsheet with summary statistics for our data, as well as a literature review of VN morphological parameters.

#### 5 Supplement 5

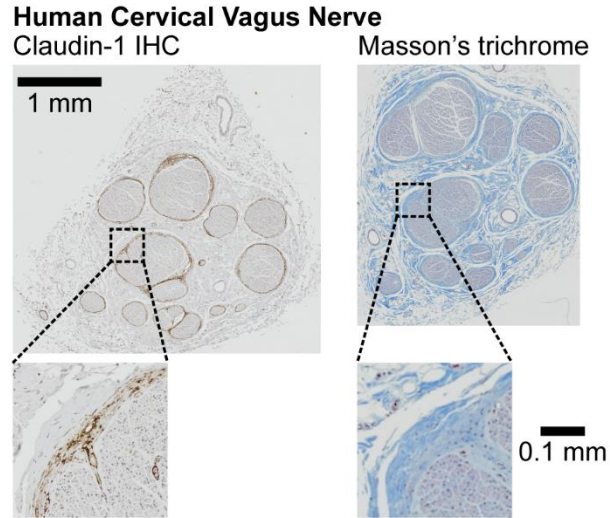

**Figure 17.** Comparison of human perineurium segmentation with claudin-1 IHC (left) versus Masson's trichrome staining (right). These sections are from the same sample, but the fascicular organization can be seen to change over the small distance ( $\sim 250 \mu\text{m}$ ). The zoomed views show a matched location between the two images where the Masson's trichrome suggested a thicker perineurium, but the claudin-1 more selectively identified the perineurial tissue.

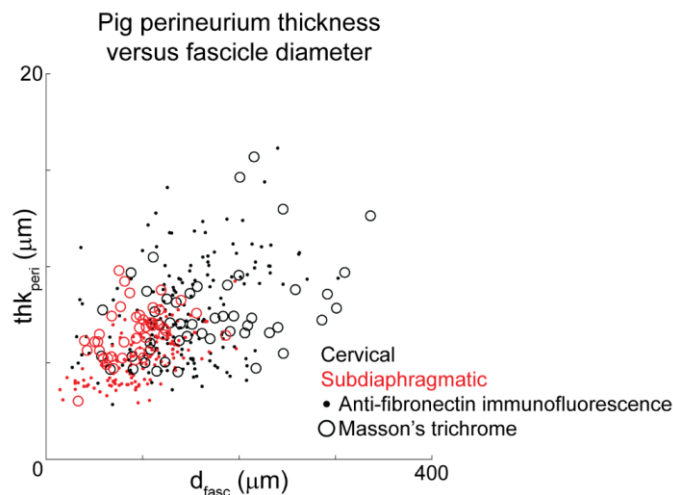

**Figure 18.** Perineurium thickness as a function of effective fascicle diameter for pig vagus nerve samples stained with Masson's trichrome (open circles; one cervical and one subdiaphragmatic) or labeled with anti-fibronectin (dots; four cervical and four subdiaphragmatic).

6 Supplement 6

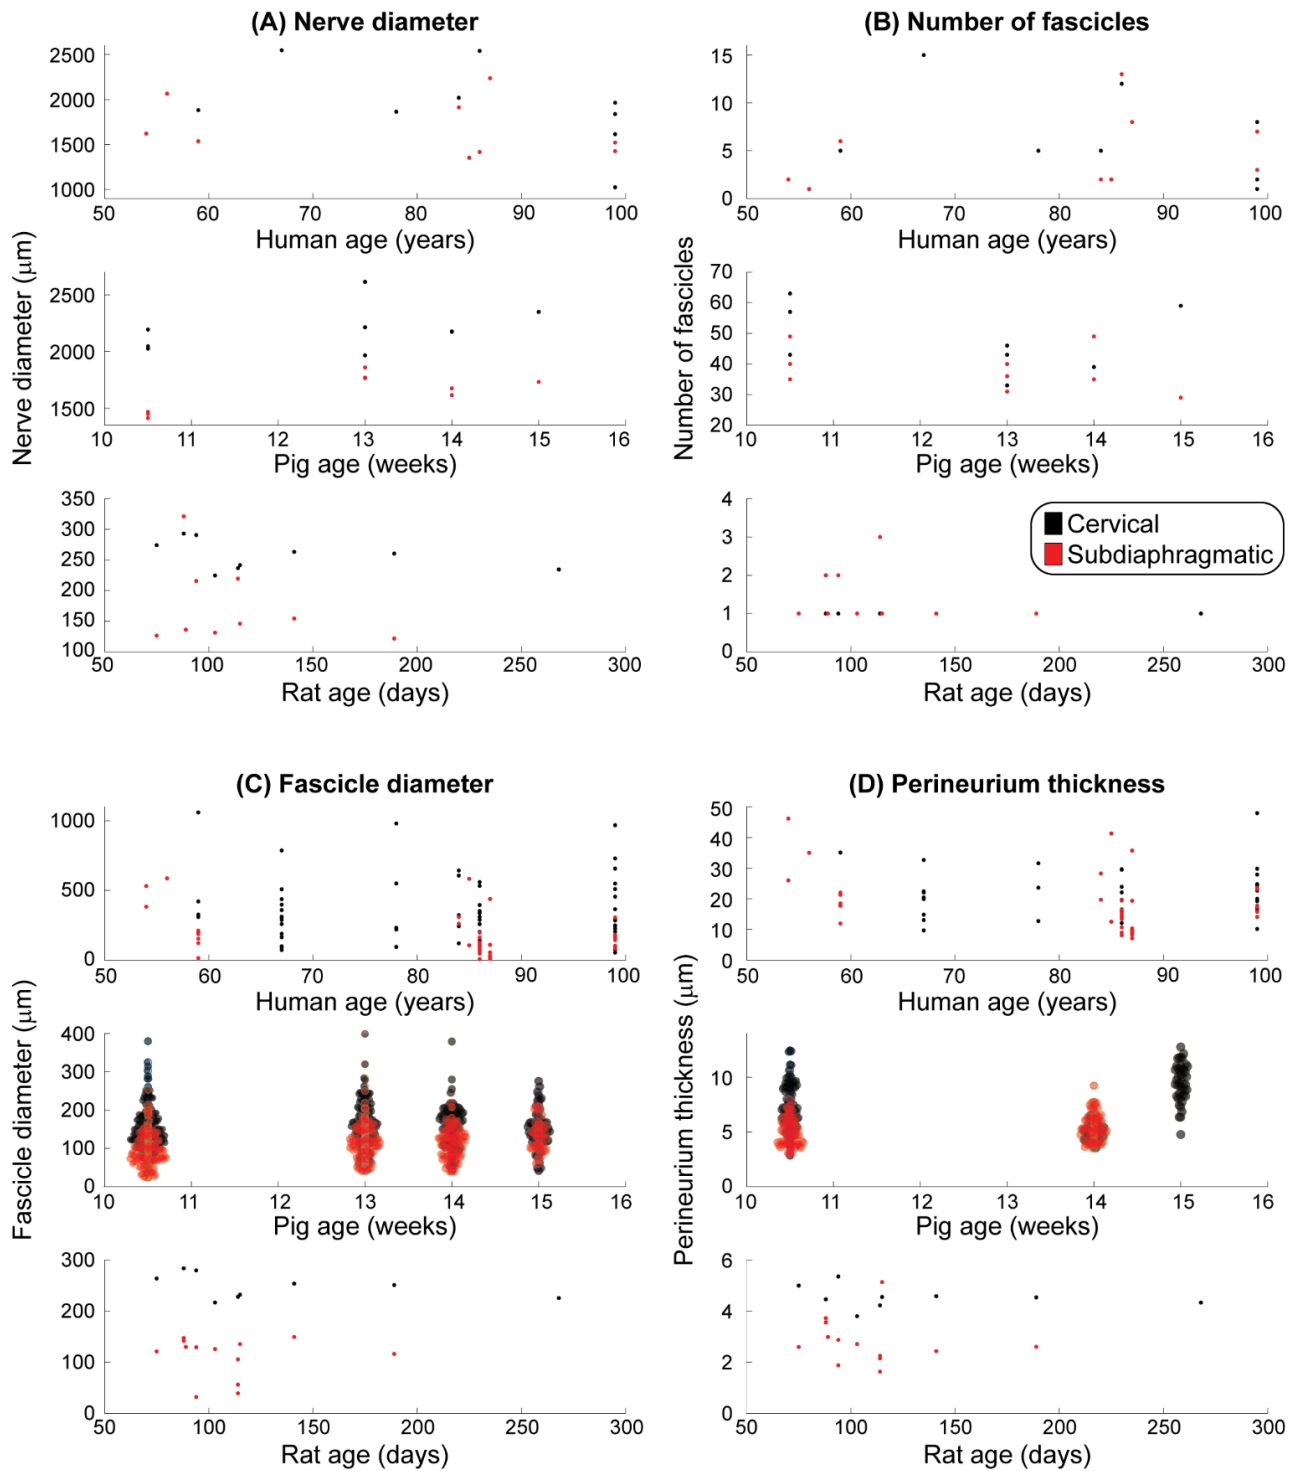

**Figure 19.** Nerve morphology metrics versus age. Note that all human subjects over 89 years old were plotted as 99 years old.



### References

- Pelot, N.A., Ezzell, J.A., Goldhagen, G.B., Cariello, J.E., Clissold, K.A., Grill, W.M., 2020a. Quantified Morphology of the Human Vagus Nerve with Anti-Claudin-1. Version 6, SPARC Data & Resource Center. <https://doi.org/10.26275/nluu-1ews>
- Pelot, N.A., Ezzell, J.A., Goldhagen, G.B., Clissold, K.A., Grill, W.M., 2020b. Quantified Morphology of the Pig Vagus Nerve with Anti-Fibronectin. Version 1, SPARC Data & Resource Center. <https://doi.org/10.26275/8pc2-rhu2>
- Pelot, N.A., Ezzell, J.A., Goldhagen, G.B., Musselman, E.D., Cariello, J.E., Clissold, K.A., Grill, W.M., 2020c. Human Vagus Nerve Stained with Masson's Trichrome. Version 3, SPARC Data & Resource Center. <https://doi.org/10.26275/sydt-lkiw>
- Pelot, N.A., Ezzell, J.A., Goldhagen, G.B., Musselman, E.D., Cariello, J.E., Clissold, K.A., Grill, W.M., 2020d. Pig Vagus Nerve Stained with Masson's Trichrome. Version 1, SPARC Data & Resource Center. <https://doi.org/10.26275/pgr9-bk2e>
- Pelot, N.A., Ezzell, J.A., Goldhagen, G.B., Musselman, E.D., Cariello, J.E., Clissold, K.A., Grill, W.M., 2020e. Rat Vagus Nerve Stained with Masson's Trichrome. Version 5, SPARC Data & Resource Center. <https://doi.org/10.26275/z3ab-7j9y>
